# Supplementary material for: Shifting Beyond Classical Drug Synergy in Combinatorial Therapy through Solubility Alterations
Source: bioRxiv preprint, doi:10.1101/2024.11.08.618644, version 5 (2025-07-31)
Supplement: Supplementary data 1 [file 618644_file12.xlsx]

## Sheet: IN_R
uniprot

## Sheet: IN_U
uniprot

## Sheet: IN_RU
uniprot

## Sheet: IN_AND_RU
uniprot

## Sheet: IN_OR_RU
uniprot

## Sheet: IN_L
uniprot

## Sheet: IN_S
uniprot

## Sheet: IN_LS
uniprot

## Sheet: IN_AND_LS
uniprot

## Sheet: IN_OR_LS
uniprot

[truncated: 20 more sheets: EXT_R, EXT_U, EXT_RU, EXT_AND_RU, EXT_OR_RU, EXT_L, EXT_S, EXT_LS, EXT_AND_LS, EXT_OR_LS, IN_EXT_R, IN_EXT_U, IN_EXT_RU, IN_EXT_AND_RU, IN_EXT_OR_RU, IN_EXT_L, IN_EXT_S, IN_EXT_LS, IN_EXT_AND_LS, IN_EXT_OR_LS]
