# Supplementary material for: Shifting Beyond Classical Drug Synergy in Combinatorial Therapy through Solubility Alterations
Source: bioRxiv preprint, doi:10.1101/2024.11.08.618644, version 5 (2025-07-31)
Supplement: Supplementary data 2 [file 618644_file13.xlsx]

## Sheet: IN_AND_RU
ID

## Sheet: IN_OR_RU
ID

## Sheet: IN_AND_LS
ID

## Sheet: IN_OR_LS
ID

## Sheet: EXT_AND_RU
ID

## Sheet: EXT_OR_RU
ID

## Sheet: EXT_AND_LS
ID

## Sheet: EXT_OR_LS
ID

## Sheet: IN_EXT_AND_RU
ID

## Sheet: IN_EXT_OR_RU
ID

[truncated: 2 more sheets: IN_EXT_AND_LS, IN_EXT_OR_LS]
