# Supplementary material for: Shifting Beyond Classical Drug Synergy in Combinatorial Therapy through Solubility Alterations
Source: bioRxiv preprint, doi:10.1101/2024.11.08.618644, version 5 (2025-07-31)
Supplement: Supplementary data 4 [file 618644_file15.xlsx]

## Sheet: CoPISA_targets_PTMs
Sequence
